# Supplementary material for: Effect of amoxicillin‐clavulanic acid on clinical scores, intestinal microbiome, and amoxicillin‐resistant Escherichia coli in dogs with uncomplicated acute diarrhea
Source: PubMed Central journal article supplement (PMC7255678; doi:10.1111/jvim.15775), 2020-04-23
Supplement: JVIM-34-1166-s001.pdf [file JVIM-34-1166-s001.pdf]

**Supplementary Table 1. Oligonucleotides primers/probes used in this study.**

| qPCR primers/probe | Sequence (5' - 3')                    | Target                                    | Annealing (°C) | Reference |
|--------------------|---------------------------------------|-------------------------------------------|----------------|-----------|
| Forward            | GAAGGCGGCCTACTGGGCAC                  | <i>Faecalibacterium</i>                   | 60             | [1]       |
| Reverse            | GTGCAGGCGAGTTGCAGCCT                  |                                           |                |           |
| Forward            | KGGGCTCAACMCMGTATTGCGT                | Fusobacteria                              | 51             | [2]       |
| Reverse            | TCGCGTTAGCTTGGGCGCTG                  |                                           |                |           |
| Forward            | TCTGATGTGAAAGGCTGGGGCTTA              | <i>Blautia</i>                            | 56             | [2]       |
| Reverse            | GGCTTAGCCACCCGACACCTA                 |                                           |                |           |
| Forward            | CCTACGGGAGGCAGCAGT                    | Universal Bacteria                        | 59             | [3]       |
| Reverse            | ATTACCGCGGCTGCTGG                     |                                           |                |           |
| Forward            | CAGACGGGGACAACGATTGGA                 | <i>Turicibacter</i>                       | 63             | [2]       |
| Reverse            | TACGCATCGTCGCCTTGGA                   |                                           |                |           |
| Forward            | GTAAATACCTTTGCTCATTGA                 | <i>E. coli</i>                            | 55             | [4]       |
| Reverse            | ACCAGGGTATCTAATCCTGTT                 |                                           |                |           |
| Forward            | AGTAAGCTCCTGATACTGTCT                 | <i>C. hiranonis</i>                       | 50             | [5]       |
| Reverse            | AGGGAAAGAGGAGATTAGTCC                 |                                           |                |           |
| Forward            | TTATTTGAAAGGGGCAATTGCT                | <i>Streptococcus</i>                      | 54             | [6]       |
| Reverse            | GTGAACTTTCCACTCTCACAC                 |                                           |                |           |
| Forward            | AACTATAGGAGAACAAAATACAATAG            | <i>C. perfringens</i><br>enterotoxin gene | 55             | [7]       |
| Reverse            | TGCATAAACCTTATAATATACATATTC           |                                           |                |           |
| Probe              | FAM-TCTGTATCTACAACCTGCTGGTCCA-TAMURA  |                                           |                |           |
| Forward            | CGCATAACGTTGAAAGATGG                  | <i>C. perfringens</i> 16S<br>rRNA gene    | 58             | [8]       |
| Reverse            | CCTTGGTAGGCCGTTACCC                   |                                           |                |           |
| Probe              | FAM-TCATCATTCAACCAAAGGAGCAATCC-TAMURA |                                           |                |           |
| Forward            | AACAATATGTACAGGTATAACT                | <i>C. perfringens netF</i><br>toxin gene  | 55             | [9]       |
| Reverse            | TTGATAGGTATAATATGGTTCT                |                                           |                |           |
| Forward            | TTGAGCGATTTACTTCGGTAAAGA              | <i>C. difficile</i>                       | 61             | [10]      |
| Reverse            | TGTAAGGCTCACCTTTGATATTCA              |                                           |                |           |
| Forward            | 5'-GAGCTTTCAAGCCCTTATATCC-3'          | <i>C. jejuni</i>                          | 62.5           | [11]      |
| Reverse            | 5'-AAGAACACCGCGAAGTTATTT-3'           |                                           |                |           |

## REFERENCES

1. Garcia-Mazcorro JF, Suchodolski JS, Jones KR, et al. Effect of the proton pump inhibitor omeprazole on the gastrointestinal bacterial microbiota of healthy dogs. *FEMS Microbiol Ecol.* 2012;80(3):624-636.
2. Suchodolski JS, Markel ME, Garcia-Mazcorro JF, et al. The fecal microbiome in dogs with acute diarrhea and idiopathic inflammatory bowel disease. *PLoS one.* 2012;7(12):e51907.
3. Lubbs D, Vester B, Fastinger N, Swanson KS. Dietary protein concentration affects intestinal microbiota of adult cats: a study using DGGE and qPCR to evaluate differences in microbial populations in the feline gastrointestinal tract. *J Anim Physiol Anim Nutr (Berl).* 2009;93(1):113-121.
4. Malinen E, Rinttilä T, Kajander K, et al. Analysis of the fecal microbiota of irritable bowel syndrome patients and healthy controls with real-time PCR. *Am J Gastroenterol.* 2005;100(2):373.
5. Kitahara M, Sakamoto M, Benno Y. PCR detection method of *Clostridium scindens* and *C. hiranonis* in human fecal samples. *Microbiol Immunol.* 2001;45(3):263-266.
6. Furet JP, Quéneé P, Tailliez P. Molecular quantification of lactic acid bacteria in fermented milk products using real-time quantitative PCR. *Int J Food Microbiol.* 2004;97(2):197-207.
7. Gurjar A, Hegde N, Love B, Jayarao B. Real-time multiplex PCR assay for rapid detection and toxintyping of *Clostridium perfringens* toxin producing strains in feces of dairy cattle. *Mol Cell Probes.* 2008;22(2):90-95.
8. Wise MG, Siragusa GR. Quantitative detection of *Clostridium perfringens* in the broiler fowl gastrointestinal tract by real-time PCR. *Appl. Environ. Microbiol.* 2005;71(7):3911-3916.
9. Gohari IM, Parreira VR, Nowell VJ, et al. A novel pore-forming toxin in type A *Clostridium perfringens* is associated with both fatal canine hemorrhagic gastroenteritis and fatal foal necrotizing enterocolitis. *PLoS one.* 2015;10(4):e0122684.
10. Penders J, Vink C, Driessen C, et al. Quantification of *Bifidobacterium* spp., *Escherichia coli* and *Clostridium difficile* in faecal samples of breast-fed and formula-fed infants by real-time PCR. *FEMS Microbiol Lett.* 2005;243(1):141-147.
11. Chaban B, Musil KM, Himsworth CG, Hill JE. Development of *cpn60*-based real-time quantitative PCR assays for the detection of 14 *Campylobacter* species and application to screening of canine fecal samples. *Appl. Environ. Microbiol.* 2009;75(10):3055-3061.
