# Supplementary material for: Effect of amoxicillin‐clavulanic acid on clinical scores, intestinal microbiome, and amoxicillin‐resistant Escherichia coli in dogs with uncomplicated acute diarrhea
Source: PubMed Central journal article supplement (PMC7255678; doi:10.1111/jvim.15775), 2020-04-23
Supplement: JVIM-34-1166-s002.pdf [file JVIM-34-1166-s002.pdf]

**Supplementary Table 2. Laboratory results in dogs with diarrhea**

|                   |        | AG (n=8) |          | PG (n=8) |          | p-value |
|-------------------|--------|----------|----------|----------|----------|---------|
|                   |        | Median   | Range    | Median   | Range    |         |
| urea              | mg/dl  | 21       | 12-58    | 20       | 8-37     | .362    |
| creatinine        | mg/dl  | 0.6      | 0.5-1.8  | 0.95     | 0.5-1.2  | .235    |
| SDMA              | µg/dl  | 10.5     | 5-17     | 12.5     | 9-19     | .191    |
| sodium            | mmol/l | 146.5    | 145-151  | 143.5    | 141-147  | .002    |
| chloride          | mmol/l | 113.5    | 106-118  | 110.5    | 107-115  | .192    |
| potassium         | mmol/l | 4.3      | 3.9-4.9  | 4.6      | 3.8-4.8  | .904    |
| phosphate         | mmol/l | 1.2      | 0.0-1.8  | 1.35     | 0.9-2.0  | .482    |
| total bilirubin   | mg/dl  | 0.2      | 0.2-0.3  | 0.2      | 0.2-0.3  | >.999   |
| ALT               | U/l    | 54.5     | 18-132   | 45       | 28-79    | .386    |
| ALP               | U/l    | 36       | 17-334   | 43.5     | 17-211   | .643    |
| gamma-GT          | U/l    | 4.5      | 3-11     | 4        | 3-6      | .178    |
| AST               | U/l    | 27.5     | 20-35    | 35.5     | 16-45    | .088    |
| GLDH              | U/l    | 3.5      | 2-8      | 3.5      | 2-7      | .703    |
| total protein     | g/dl   | 6.1      | 5.4-6.7  | 6.3      | 5.4-7.5  | .740    |
| albumin           | g/dl   | 3.1      | 2.3-3.6  | 3.15     | 2.5-3.4  | .890    |
| globulin          | g/dl   | 3.1      | 2.5-3.6  | 3.25     | 2.4-4.1  | .516    |
| glucose           | mg/dl  | 92.5     | 51-105   | 95.5     | 55-116   | .458    |
| alpha-amylase     | U/l    | 723      | 407-1379 | 729      | 510-1106 | .813    |
| lipase            | U/l    | 104      | 36-224   | 37       | 16-137   | .048    |
| cholesterol       | mg/dl  | 252.5    | 148-317  | 260.5    | 188-502  | .645    |
| fructosamine      | µmol/l | 252      | 226-310  | 286.5    | 207-378  | .505    |
| creatinine kinase | U/l    | 90       | 60-302   | 91.5     | 60-204   | .590    |
| calcium           | mmol/l | 2.4      | 2.4-2.6  | 2.425    | 2.3-2.8  | .306    |
| magnesium         | mmol/l | 0.8      | 0.8-1.0  | 0.8      | 0.7-1.0  | .770    |
| triglyceride      | mg/dl  | 61       | 27-228   | 61.5     | 26-163   | .778    |

|             |                       |       |           |       |            |       |
|-------------|-----------------------|-------|-----------|-------|------------|-------|
| RBC         | x 10 <sup>12</sup> /L | 6.7   | 4.7-8.6   | 7.45  | 6.6-8.4    | .066  |
| HGB         | mmol/L                | 16.15 | 11.2-20.5 | 16,10 | 10.6-19.1  | .165  |
| PCV         | %                     | 47.4  | 36.7-60.0 | 49.4  | 46.0-54.2  | .302  |
| WBC         | x 10 <sup>9</sup> /L  | 9.7   | 5.3-11.6  | 9.75  | 5.8-27.1   | .489  |
| basophils   | /μl                   | 0     | 0-1.0     | 0     | 0          | >.999 |
| eosinophils | /μl                   | 319.5 | 97-1043   | 256.5 | 0-890      | .879  |
| neutrophils | /μl                   | 6475  | 3900-9080 | 6340  | 4228-21122 | .645  |
| bands       | /μl                   | 0     | 0-1275    | 0     | 0          | >.999 |
| lymphocytes | /μl                   | 1259  | 649-2434  | 1751  | 730-3002   | .254  |
| monocytes   | /μl                   | 600   | 194-1159  | 567   | 77-3250    | .505  |
| platelets   | x 10 <sup>9</sup> /L  | 258   | 121-373   | 176.5 | 103-307    | .281  |

AG = amoxicillin clavulanic acid group; PG = placebo group; SDMA = symmetric dimethylarginine assay; ALT= alanine transaminase; ALP= alkaline phosphatase; gamma-GT= gamma-glutamyl transferase; AST= aspartate aminotransferase; GLDH= glutamate dehydrogenase; RBC= red blood cells; HGB= hemoglobin; WBC= white blood cells; \* significance level was set at .0014 after Bonferroni correction
